# Supplementary material for: Ultrasensitive and bifunctional ZnO nanoplates for an oxidative electrochemical and chemical sensor of NO2: implications towards environmental monitoring of the nitrite reaction
Source: Royal Society of Chemistry journal article supplement (doi:10.1039/c8ra01358f), 2018-01-01
Supplement: c8ra01358f1.pdf [file c8ra01358f1.pdf]

## Supporting Information

### **Ultrasensitive and Bifunctional ZnO Nanoplates for Oxidative Electrochemical and Chemical Sensor of NO<sub>2</sub>: Implications towards Environmental Monitoring of Nitrite Reaction**

Shivsharan M. Mali,<sup>a</sup> Parag P. Chavan,<sup>a</sup> Yuvraj H. Navale,<sup>b</sup> Vikas B. Patil,<sup>b</sup> Bhaskar R. Sathe<sup>a\*</sup>

<sup>a</sup>Department of Chemistry, Dr. Babasaheb Ambedkar Marathwada University, Aurangabad, 431004, Maharashtra, India

<sup>b</sup>Functional Materials Research Laboratory, School of Physical Sciences, Solapur University, Solapur, 413255, Maharashtra, India

Corresponding author E-mail: [bhaskarsathe@gmail.com](mailto:bhaskarsathe@gmail.com)

#### **SI1: Operational Temperature vs Response Studies:**

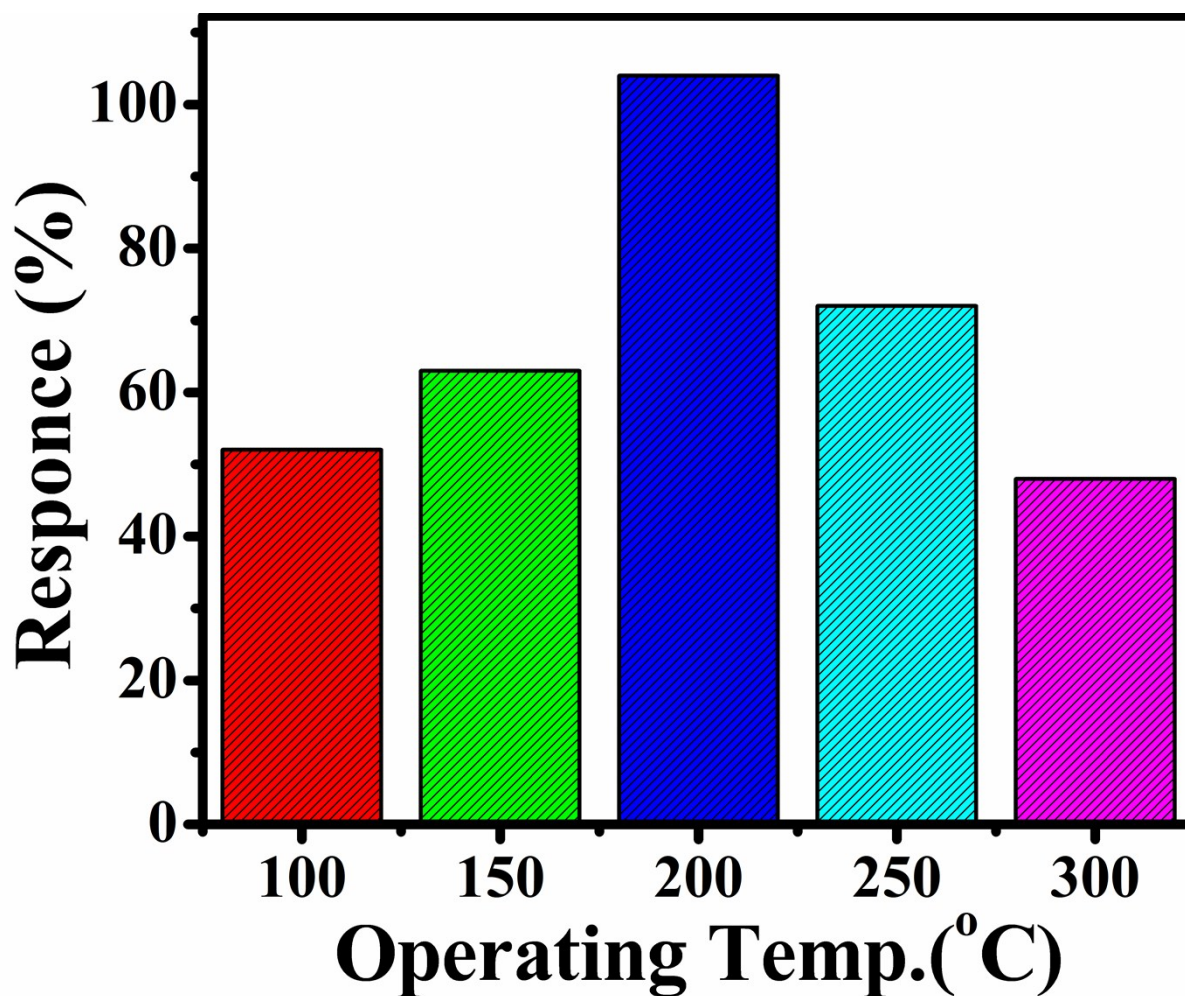

Fig S1: Operating temperature vs response (%) for 100 ppm NO<sub>2</sub> gas for different temperatures from 100- 300 °C.
